# Supplementary material for: Surface engineering assisted CoNiP nanosheet arrays for electrochemical overall water splitting
Source: Royal Society of Chemistry journal article supplement (doi:10.1039/d4ma00114a), 2024-01-01
Supplement: d4ma00114a1.pdf [file d4ma00114a1.pdf]

## Surface Engineering Assisted CoNiP Nanosheet Arrays for Electrochemical Overall Water Splitting

Linfei Zhang<sup>1,\*</sup>, Chenyi Liu<sup>1</sup>, Ningfa He<sup>1</sup>, Xinru He<sup>1</sup>, Yuhuan Jiang<sup>1</sup>, Changshuai Guo<sup>1</sup>, Yong Hu<sup>1</sup>  
and Shengliang Zhong<sup>2,\*</sup>

1. School of Automotive Engineering, Guangdong Polytechnic of Science and Technology, ZhuHai  
519090, China

2. College of Chemistry and Chemical Engineering, Jiangxi Normal Univesity, Nanchang 330022,  
China.

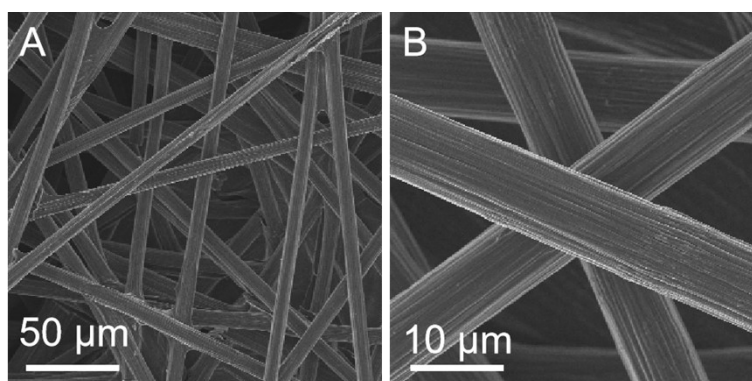

**Fig. S1** SEM image shows the morphology of bare CFP with width up to tens of micrometer.

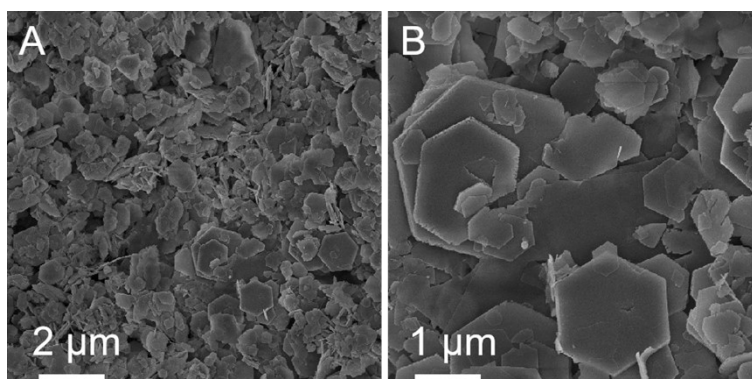

**Fig S2** (A, B) the low magnification SEM images of the Co(OH)<sub>2</sub> hexagonal nanoflakes without CFP.

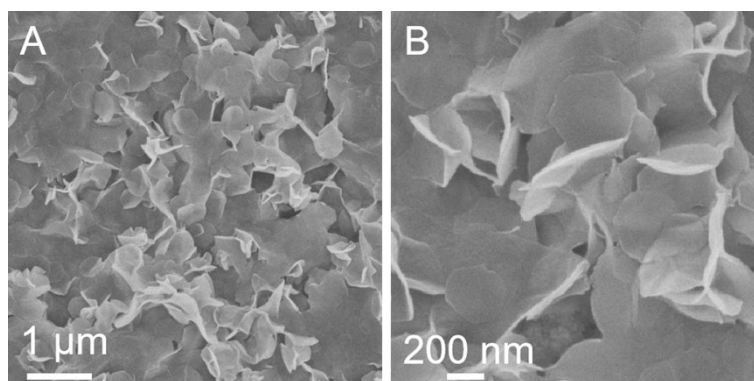

**Fig. S3** SEM images of CoNi(OH)<sub>2</sub> layered double hydroxides (CoNi-LDH) without CFP.

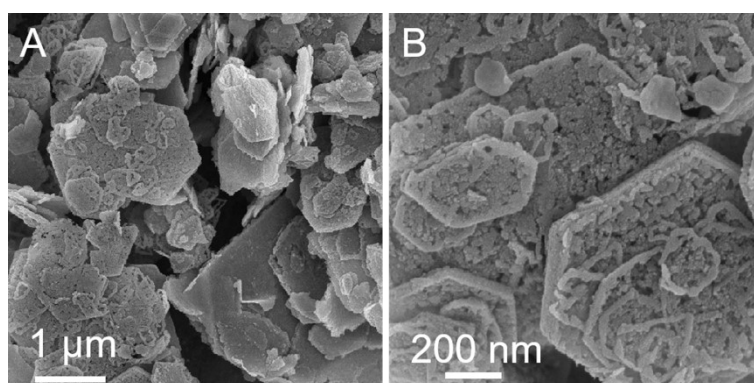

**Fig. S4** SEM images of porous hexagonal CoP nanoflakes without CFP.

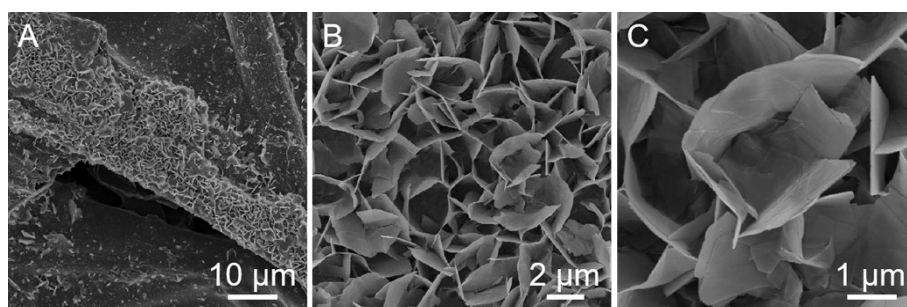

**Fig. S5** SEM images of Co(OH)<sub>2</sub> nanosheets electrodeposited on carbon fibers paper.

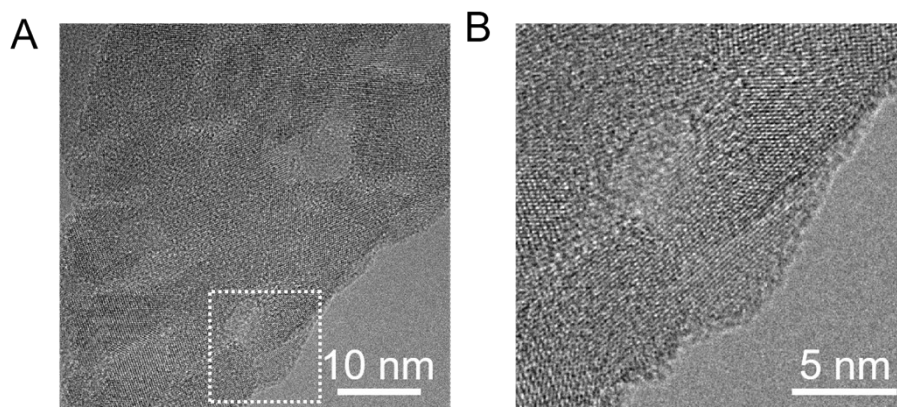

**Fig. S6** HRTEM images of porous CoNiP nanosheets on the surface of CFP.

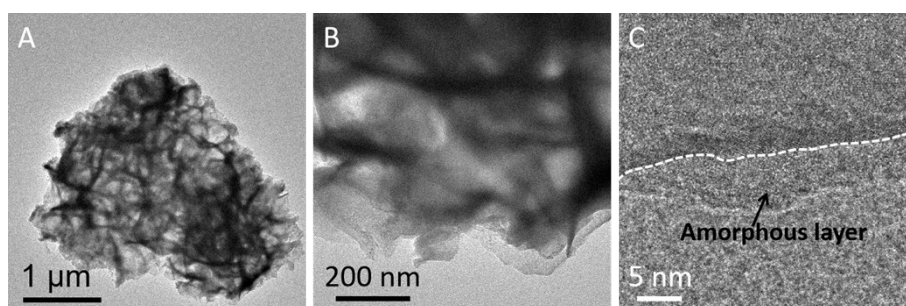

**Fig. S7** TEM and HRTEM images of porous CoNiP/CoOOH nanosheets on the surface of CFP.

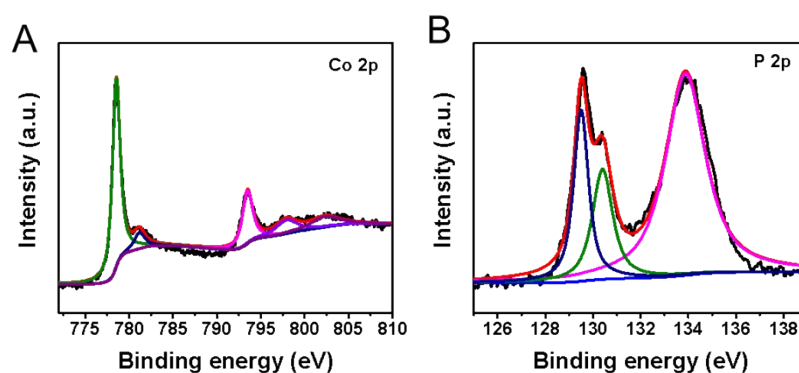

**Fig. S8** High-resolution XPS spectra of the as-prepared CoP/CoOOH-CFP. (A) Co 2p, (B) P 2p. The red curve is the sum, the purple curve is the baseline, and the other curves are the fitted.

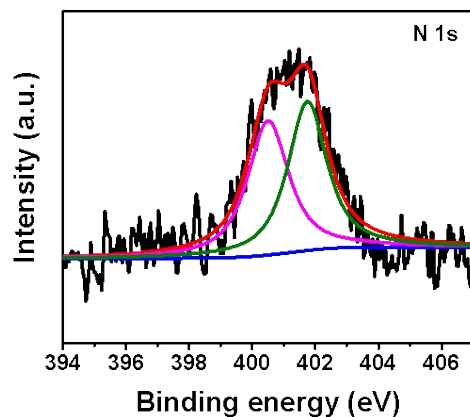

**Fig. S9** N 1s spectrum of High-resolution XPS spectra of the as-prepared CoNiP/CoOOH-CFP.

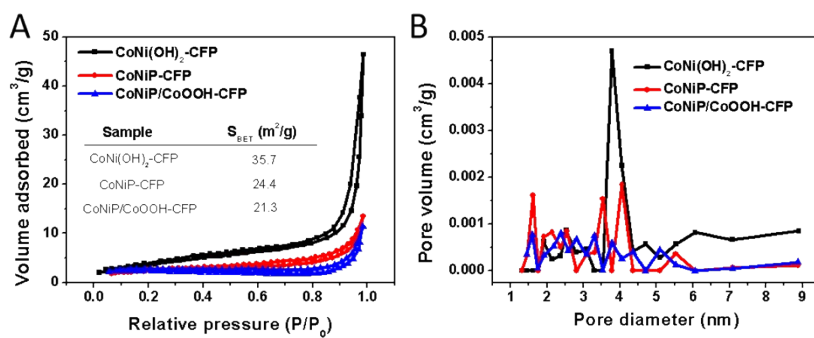

**Fig. S10** (A) N<sub>2</sub> adsorption-desorption isothermal plots of CoNi(OH)<sub>2</sub>-CFP, CoNiP-CFP, and CoNiP/CoOOH-CFP. (B) The related pore-size distribution curves for those examined samples.

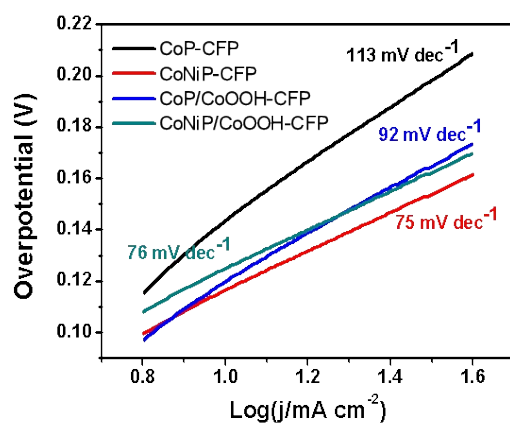

**Fig. S11** LSV polarization curves derived Tafel plots of different catalysts in 1.0 M KOH electrolyte for electrocatalytic HER.

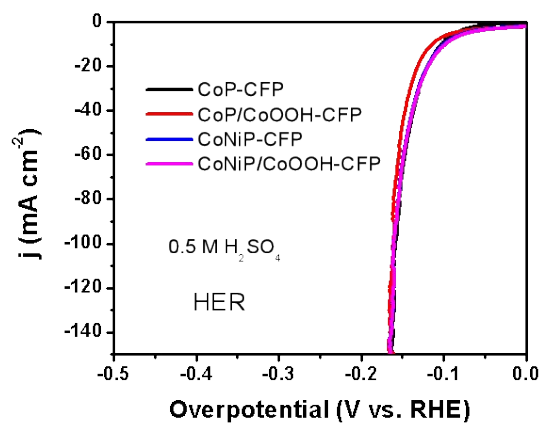

**Fig. S12** LSV polarization curves of different catalysts in 0.5 M H<sub>2</sub>SO<sub>4</sub> electrolyte for HER.

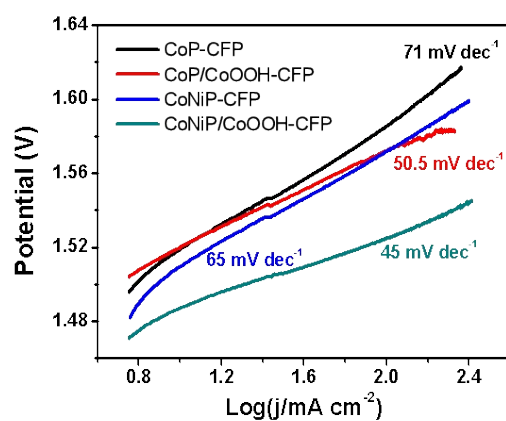

**Fig. S13** LSV polarization curves derived Tafel plots of different catalysts in 1.0 M KOH electrolyte for electrocatalytic OER.

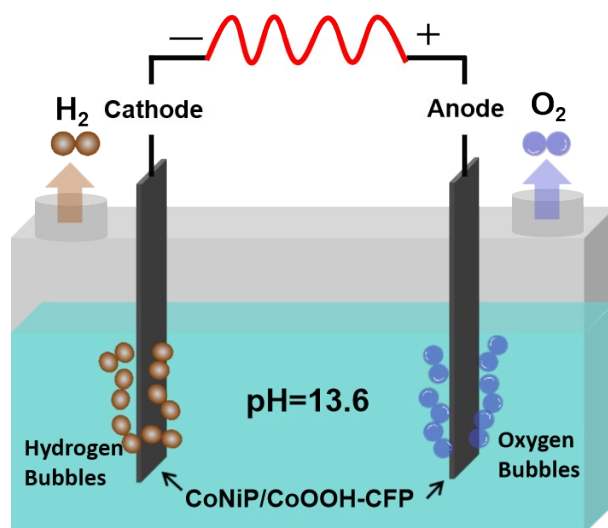

**Fig. S14** Schematic diagram of self-made alkaline electrolyzer for overall water splitting.

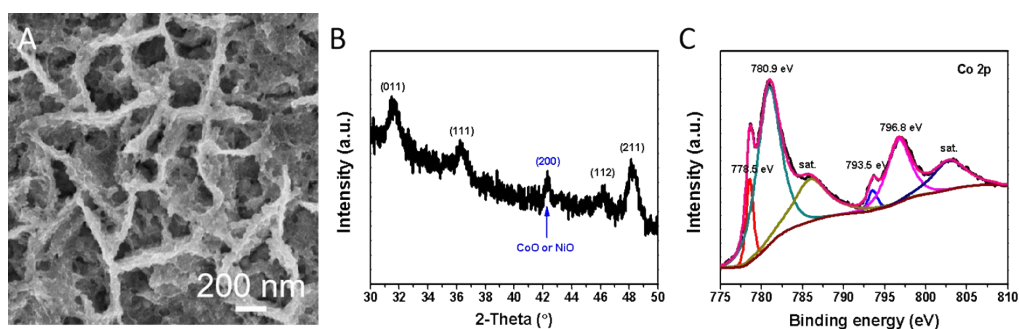

**Fig. S15** The SEM image, XRD pattern, and Co 2p spectrum of CoNiP/CoOOH-CFP after 50 hours.

**Table S1. Electrochemical activities of CFP-supported CoNiP-CoOOH and other cobalt-based HER electrocatalysts in alkaline solution.**

| Samples                            | $\eta_{10}$ for HER | Tafel slope (HER) | References                                            |
|------------------------------------|---------------------|-------------------|-------------------------------------------------------|
| CoNiP-CoOOH                        | 0.120 V             | 76                | This work                                             |
| CoNi <sub>4</sub> P <sub>2</sub>   | 0.430 V             | NG                | <i>Energy Environ. Sci.</i> ,<br>2014, <b>7</b> , 329 |
| CoO-CoSe <sub>2</sub>              | 0.337 V             | 131               | <i>Adv. Sci.</i> ,<br>2016, <b>3</b> , 1500426        |
| CoS <sub>2</sub> -Ti               | 0.260 V             | 129               | <i>Electro. Acta</i> ,<br>2014, <b>148</b> , 170      |
| CoP/PCNF                           | 0.191 V             | 111               | <i>Nano Res.</i> ,<br>2018, <b>11</b> , 1274          |
| CoN <sub>x</sub> /C                | 0.247 V             | NG                | <i>Nat. Commun.</i> ,<br>2015, <b>6</b> , 7992        |
| NiCoP/rGO                          | 0.124 V             | 91                | <i>Adv. Funct. Mater.</i> ,<br>2016, <b>26</b> , 6785 |
| NiFeCoP/NM                         | 0.330 V             | 130               | <i>Electro. Acta</i> ,<br>2019, <b>306</b> , 651      |
| Co <sub>3</sub> O <sub>4</sub> @Ni | 0.225 V             | 68                | <i>J. Power Sources</i> ,<br>2017, <b>341</b> , 250   |
| Ni <sub>2</sub> P/CoP@C-NSG        | 0.144 V             | 61                | <i>Mater. Today Sustain.</i> ,                        |

**Table S2. Electrochemical activities of CFP-supported CoNiP-CoOOH and other cobalt-based OER electrocatalysts in alkaline solution.**

| Samples                            | $\eta_{10}$ for HER | Tafel slope (HER) | References                                                |
|------------------------------------|---------------------|-------------------|-----------------------------------------------------------|
| CoNiP-CoOOH                        | 1.488 V             | 45                | This work                                                 |
| Co <sub>3</sub> O <sub>4</sub> @Ni | 1.500 V             | 84                | <i>J. Power Sources</i> ,<br>2017, <b>341</b> , 250       |
| NiP Plates                         | 1.530 V             | 64                | <i>Energy Environ. Sci.</i> ,<br>2016, <b>9</b> , 1246.   |
| CoP-TiO <sub>x</sub>               | 1.567 V             | 72.1              | <i>Small</i> ,<br>2020, <b>16</b> , 1905075.              |
| Cu-CoP                             | 1.482 V             | 89.1              | <i>Chem. Eng. J.</i> ,<br>2022, <b>432</b> , 134303.      |
| CeO <sub>x</sub> -CoP/C            | 1.543 V             | 69                | <i>J. Mater. Sci.</i> ,<br>2018, <b>53</b> , 12123.       |
| O-CoP                              | 1.543 V             | 91.3              | <i>Adv. Funct. Mater.</i> ,<br>2020, <b>30</b> , 1905252. |
| FeP-CoP                            | 1.506 V             | 37.71             | <i>RSC Adv.</i> ,<br>2023, <b>13</b> , 15031.             |
| Mn-CoP                             | 1.547 V             | 65.1              | <i>J. Mater. Res.</i> ,<br>2018, <b>33</b> , 1258.        |
| CoP-CoFeP                          | 1.496 V             | 35.6              | <i>ACS Nano</i> ,<br>2023, <b>17</b> , 22744.             |



|            |         |      |                                                           |
|------------|---------|------|-----------------------------------------------------------|
| CoP-NCNHP  | 1.540 V | 70   | <i>J. Am. Chem. Soc.</i> ,<br>2018, <b>140</b> , 2610.    |
| CoP/Co-N-C | 1.550 V | 115  | <i>Small</i> ,<br>2023, <b>19</b> , 2207474.              |
| CoFeP@C    | 1.492 V | 44.8 | <i>Adv. Energy Mater.</i> ,<br>2022, <b>12</b> , 2202394. |

---
